# Supplementary material for: Phylogenetic Classification of Global Porcine Deltacoronavirus (PDCoV) Reference Strains and Molecular Characterization of PDCoV in Taiwan
Source: MDPI journal article supplement (doi:10.3390/v13071337), 2021-07-11
Supplement: s1 [file s1]

## Supplementary material

**Table S1.** Information on the 17 primer pairs used in the present study.

| Primer   | Sequences (5'-3')             | Nucleotide position | Annealing temperature (°C) | Reference  |
|----------|-------------------------------|---------------------|----------------------------|------------|
| DCor-F1  | ACATGGGGACTAAAGATAAAAATTATAGC | 1-1603              | 62                         | [2]        |
| DCor-R1  | AGACGGGCCAATTTTGACCG          |                     |                            |            |
| DCor-F2  | TGATGATGTTCTGCTAGCCT          | 1474-3293           | 61                         | [2]        |
| DCor-R2  | GCTCATCGCCTACATCAGTA          |                     |                            |            |
| DCor-F3  | CGGATTTAAAACACAGACT           | 3084-4853           | 58                         | [2]        |
| DCor-R3  | ACGACTTTACGAGGATGAAT          |                     |                            |            |
| DCor-F4  | CTCCTGTACAGGCCTTACAA          | 4734-6413           | 61                         | [2]        |
| DCor-R4  | TCACACGTATAGCCTGCTGA          |                     |                            |            |
| DCor-F5  | CTCAATGCAGAAGACCAGTC          | 6284-8053           | 59                         | [2]        |
| DCor-R5  | CAGCTTGGTCTTAAGACTCT          |                     |                            |            |
| DCor-F6  | GGTACTGCTTCTGATAAGGAT         | 7913-9653           | 59                         | [2]        |
| DCor-R6  | TAGGTACAGTTGTGAACCGA          |                     |                            |            |
| DCor-F7  | CTCTGCCCATATCATGCCT           | 9534-11033          | 61                         | [2]        |
| DCor-R7  | AAAGAGAGGCATTTTGCTGG          |                     |                            |            |
| DCor-F8  | ACTTGGACCCTCCTATGCGC          | 10854-12833         | 58                         | [2]        |
| DCor-R8  | GGCTCAAGATACTTATCTGC          |                     |                            |            |
| DCor-F9  | TGCAGGATGGTGAAGC              | 12716-13724         | 58                         | This study |
| DCor-R9  | CCATCAAGATCAGCAACAG           |                     |                            |            |
| DCor-F10 | CTGCTAATGTAGCCACCT            | 13484-14465         | 58                         | This study |
| DCor-R10 | GCAGTGTGGCGATAGA              |                     |                            |            |
| DCor-F11 | TGTTACGCAGACTACACATA          | 14274-16013         | 58                         | [2]        |
| DCor-R11 | TCATAGCCGCAGCGCTTAAA          |                     |                            |            |
| DCor-F12 | TGTGGTGTTTAGGCAGGCAA          | 15894-17753         | 64                         | [2]        |
| DCor-R12 | GTGGCGGTTACGCCTAAACC          |                     |                            |            |
| DCor-F13 | CAAACCTCTTTGACAATCGCA         | 17633-19193         | 59                         | [2]        |
| DCor-R13 | GCTAAAGGAGAATAGGTTGGTG        |                     |                            |            |
| DCor-F14 | CTGAACATTTCATTCTCACCC         | 18974-20906         | 58                         | [2]        |
| DCor-R14 | GAAGGTGGTGGCATTGTGG           |                     |                            |            |
| DCor-F15 | GTCTTACCGTGTGAAACCCC          | 20757-22436         | 63                         | [2]        |
| DCor-R15 | AACATCCCACTGAGGAGGTG          |                     |                            |            |
| DCor-F16 | TTTTATAACACCACCGCTGC          | 22317-24000         | 60                         | [2]        |
| DCor-R16 | GGCCATGATAGATTGGTGTC          |                     |                            |            |
| DCor-F17 | ATGGTGAGCCTTTACTGCTT          | 23877-25415         | 62                         | [2]        |
| DCor-R17 | TGCTCCATCCCCCTATAAG           |                     |                            |            |

\*Nucleotide positions are based on the reference porcine coronavirus HKU15-44 strain (GenBank accession no. JQ065042)
